# Supplementary material for: Computational Design of Hypothetical New Peptides Based on a Cyclotide Scaffold as HIV gp120 Inhibitor
Source: PubMed Central journal article supplement (PMC4627658; doi:10.1371/journal.pone.0139562), 2015-10-30

KB1

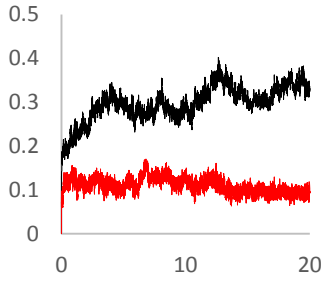

cd4m33

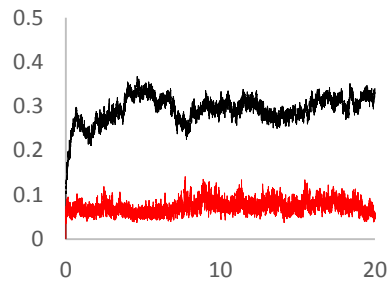

GA61

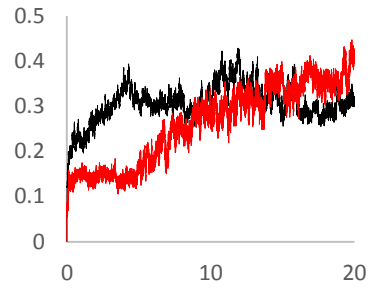

GA763

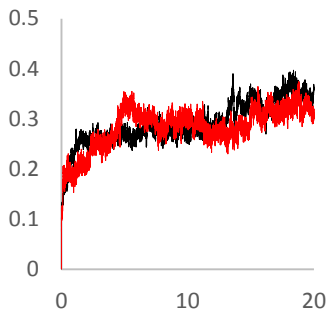

GA218

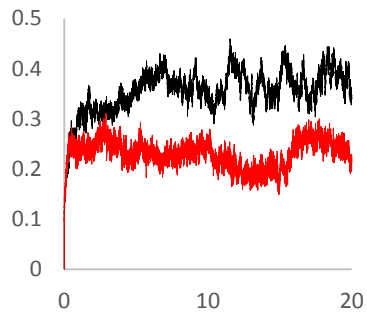

GA190

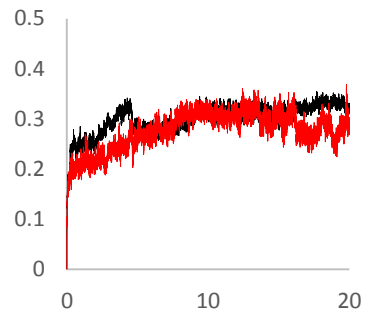

GA689

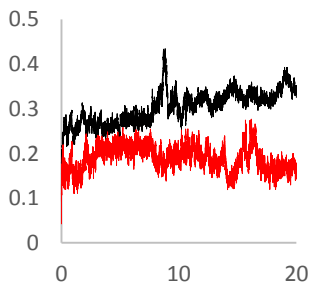

GA479

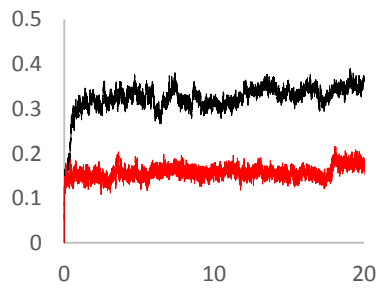

Supplement: pone.0139562.s002.pdf [file pone.0139562.s002.pdf]
