# Supplementary material for: Computational Design of Hypothetical New Peptides Based on a Cyclotide Scaffold as HIV gp120 Inhibitor
Source: PubMed Central journal article supplement (PMC4627658; doi:10.1371/journal.pone.0139562), 2015-10-30
Supplement: pone.0139562.s004.pdf [file pone.0139562.s004.pdf]

| Sequence | Residue name of CD4                             |
|----------|-------------------------------------------------|
| QFL      | Gln40- Phe43- Leu44                             |
| FLT      | Phe43-Leu44-Thr45                               |
| FLTKG    | Phe43-Leu44-Thr45-Lys46-Gly47                   |
| FLTKGPSK | Phe43-Leu44-Thr45-Lys46-Gly47-Pro48-Ser49-Lys50 |
| GSF      | Gly41-Ser42-Phe43                               |
| QGSF     | Gln40-Gly41-Ser42-Phe43                         |
| QGSFL    | Gln40-Gly41-Ser42-Phe43-Leu44                   |
| RS       | Arg59-Ser60                                     |
| FRS      | Phe43-Arg59-Ser60                               |
| RSLW     | Arg59-Ser60-Leu61-Trp62                         |
| RSLWDQ   | Arg59-Ser60-Leu61-Trp62-Asp63-Gln64             |
| NQI      | Asn32-Gln33-Ile34                               |
| KNSNQI   | Lys29-Asn30-Ser31-Asn32-Gln33-Ile34             |
| RF       | Arg59-Phe43                                     |
| RFLT     | Arg59-Phe43-Leu44-Thr45                         |
| RFLTKG   | Arg59-Phe43-Leu44-Thr45-Lys46-Gly47             |
| F        | Phe43                                           |
| SF       | Ser42-Phe43                                     |
| SFL      | Ser42-Phe43-Leu44                               |
| GSFLT    | Gly41-Ser42-Phe43-Leu44-Thr45                   |
